# Supplementary material for: Assessing the inhibitory activity of culture supernatants against foodborne pathogens of two psychrotrophic bacteria isolated from river trout
Source: PubMed Central journal article supplement (PMC9068630; doi:10.1007/s00203-022-02919-5), 2022-05-04
Supplement: 203_2022_2919_MOESM1_ESM.pdf [file 203_2022_2919_MOESM1_ESM.pdf]

**Supplementary Table S1** Phenotypic characterization of the two strains isolated from river trout

| Phenotypic characteristic   | Test conditions |     | TCPS12              | TCPS13              |
|-----------------------------|-----------------|-----|---------------------|---------------------|
| Colony morphology           |                 |     | Yellow              | White               |
| Gram                        |                 |     | Gram negative rods  | Gram negative rods  |
| Oxidase                     |                 |     | +                   | +                   |
| Hemolysis                   |                 |     | $\gamma$ -hemolysis | $\gamma$ -hemolysis |
| Motility                    | 20°C            |     | +                   | +                   |
|                             | 30°C            |     | +                   | +                   |
| H <sub>2</sub> S production | 20°C            |     | +                   | -                   |
|                             | 30°C            |     | +                   | -                   |
| Nitrate reduction           |                 |     | +                   | -                   |
| Anaerobic growth at 30°C    |                 |     | -                   | -                   |
| Aerobic growth              | 4°C             | TSB | 72h                 | 72h                 |
|                             |                 | TSA | 72h                 | 72h                 |
|                             | 15°C            | TSB | 24h                 | 24h                 |
|                             |                 | TSA | 24h                 | 24h                 |
|                             | 20°C            | TSB | 24h                 | 24h                 |
|                             |                 | TSA | 24h                 | 24h                 |
|                             | 30°C            | TSB | 24h                 | 24h                 |
|                             |                 | TSA | 24h                 | 24h                 |
|                             | 35°C            | TSB | 72h                 | 72h                 |
|                             |                 | TSA | 72h                 | 72h                 |
|                             | 37°C            | TSB | -                   | -                   |
|                             |                 | TSA | -                   | -                   |
| Tolerance to NaCl           | 0%              |     | 24h                 | 24h                 |
|                             | 1%              |     | 24h                 | 24h                 |
|                             | 3%              |     | 24h                 | 24h                 |
|                             | 5%              |     | 24h                 | 48h                 |
|                             | 8%              |     | 168h                | -                   |
|                             | 10 - 15%        |     | -                   | -                   |
| Pyocyanin production        |                 |     | nd                  | -                   |
| Pyoverdine production       |                 |     | nd                  | -                   |

\* “+”, means growth and test positive

\*\* “-“, means no growth or test negative

\*\*\* “nd”, means not determined

**Supplementary Table S2** Effect of temperature on the stability of AS13 antimicrobial activity

| <b>Temperature (°C)</b> | <b>I.A. (%)</b> |
|-------------------------|-----------------|
| 25                      | 100             |
| 40                      | 99,5            |
| 50                      | 100             |
| 60                      | 99,4            |
| 70                      | 98,9            |
| 80                      | 97,2            |
| 90                      | 96,9            |
| 100                     | 96,3            |

I.A.: absolute inhibitory activity

**Supplementary Table S3** Effect of pH on the stability of AS13 antimicrobial activity

| <b>pH</b> | <b>I.A. (%)</b> |
|-----------|-----------------|
| 2         | 84,2            |
| 4         | 91,2            |
| 6         | 100             |
| 8         | 79,1            |
| 10        | 47,6            |

I.A.: absolute inhibitory activity
